# Supplementary material for: Torque teno virus for risk stratification of graft rejection and infection in kidney transplant recipients—A prospective observational trial
Source: PubMed Central journal article supplement (PMC7496119; doi:10.1111/ajt.15810), 2020-03-08
Supplement: AJT-20-2081-s001.pdf [file AJT-20-2081-s001.pdf]

# SUPPLEMENTARY FIGURE 1

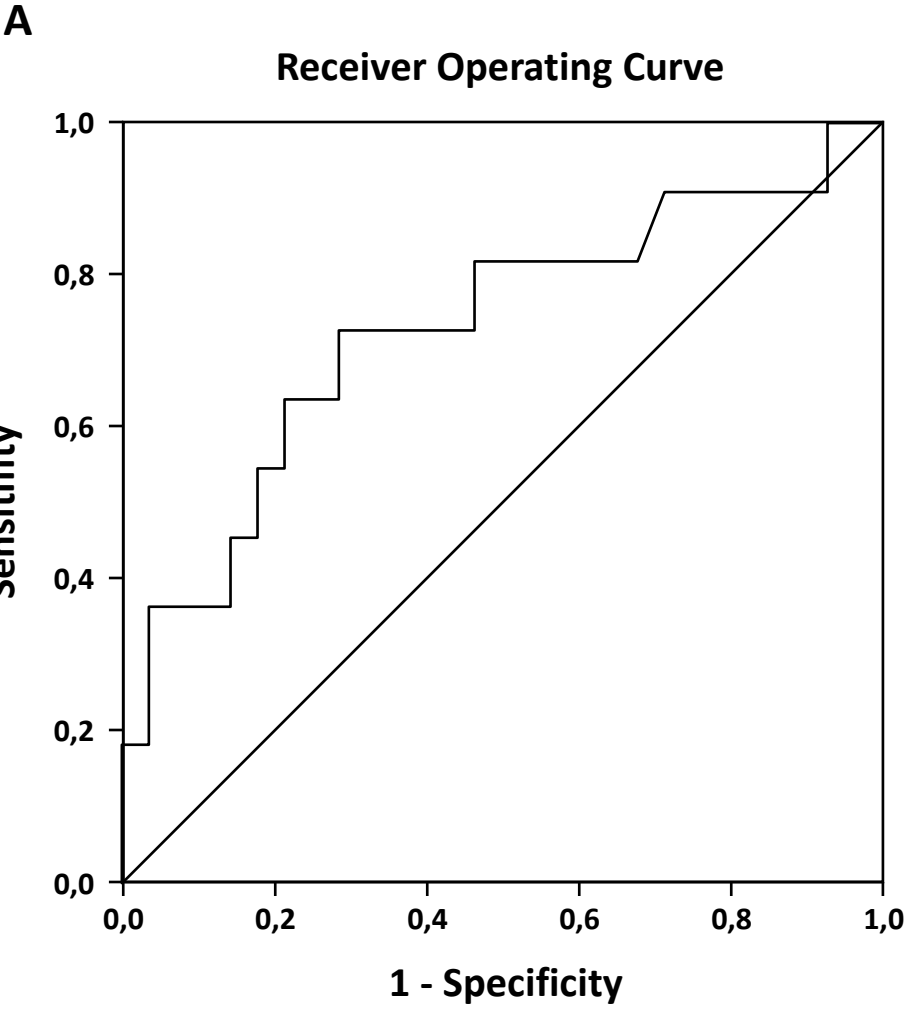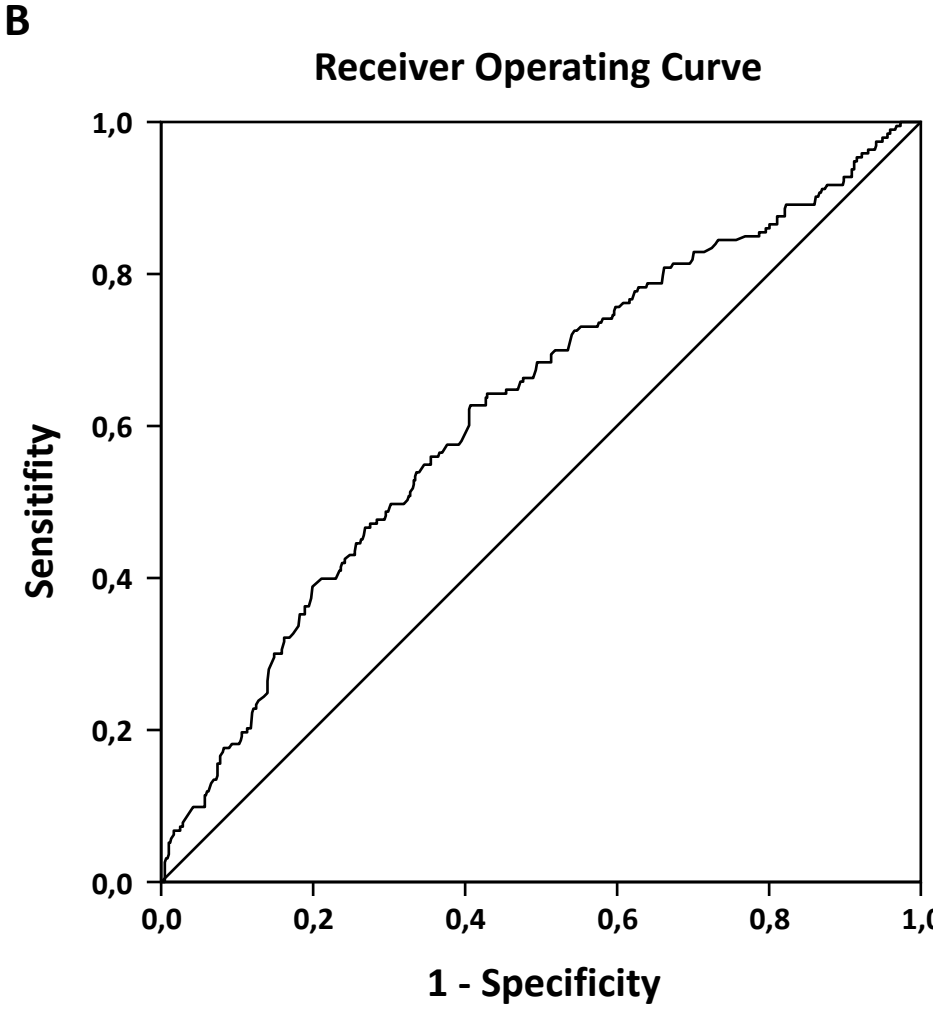

**SUPPLEMENTARY FIGURE 1A** Receiver operating curve was applied to classify graft rejection (A) and infection (B) by peripheral TTV load, respectively. Sensitivity is plotted on the y-axis and 1-specificity is plotted on the x-axis.
